# Supplementary material
Source: PubMed Central journal article supplement (PMC4498205)
Supplement: supp_tpc.15.00110_TPC2015-00110-RAR2_Supplemental_Material.pdf [file supp_tpc.15.00110_TPC2015-00110-RAR2_Supplemental_Material.pdf]

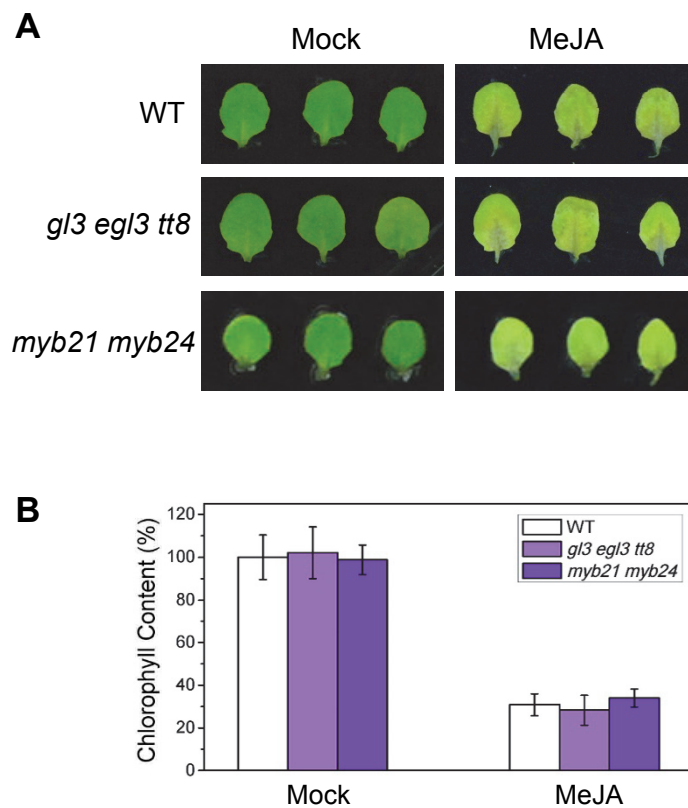

**Supplemental Figure 1. TT8, GL3, EGL3, MYB21, and MYB24 are not involved in JA-induced leaf senescence.**

(A) The senescence phenotype of leaves that were detached from 3-week-old Arabidopsis Col-0 (WT), *gl3 egl3 tt8* and *myb21 myb24* and treated without (Mock) or with 100  $\mu$ M MeJA in darkness for 6 days.

(B) Chlorophyll content of the detached leaves with the same treatment as shown in (A). The maximum value of the chlorophyll content is 2.02 mg/g FW. Data are means ( $\pm$ SD) of three biological replicates.

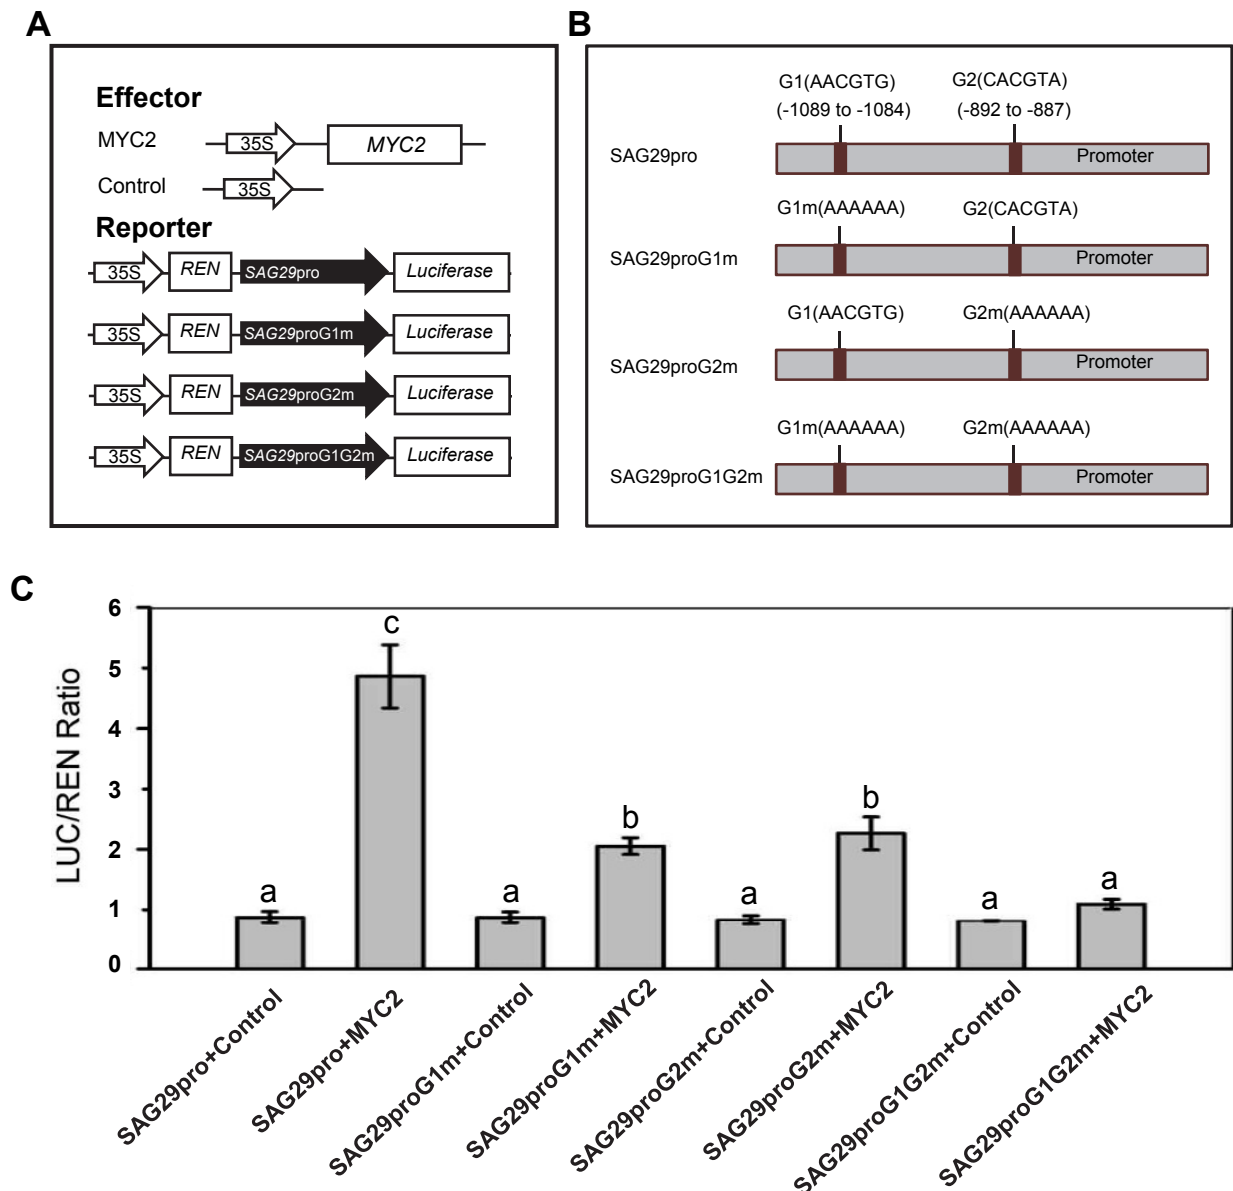

**Supplemental Figure 2. MYC2 activates the SAG29 promoter via G-box like motifs in Arabidopsis protoplast transient expression assay.**

(A) The schematic diagram shows the reporter and effector constructs (A) used in the transient expression assays of (C).

(B) The schematic diagram shows the wild-type SAG29 promoter (*SAG29pro*) and its variants (*SAG29proG1m*, *SAG29proG2m*, and *SAG29proG1G2m*) in the reporter constructs of (A). G1 and G2 denote G-box like motif in the promoter of SAG29, and were respectively or simultaneously mutated to AAAAAA in the variants (*SAG29proG1m*, *SAG29proG2m*, and *SAG29proG1G2m*) as shown.

(C) Transient expression assays show that MYC2 activates the SAG29 promoter via the two G-box like motifs G1 and G2. The LUC/REN ratio represents the *LUC* activity relative to the internal control. Data are means ( $\pm$ SD) of three biological replicates. Lowercase letters indicate significant differences by one-way ANOVA analysis with SAS software ( $P < 0.05$ ).

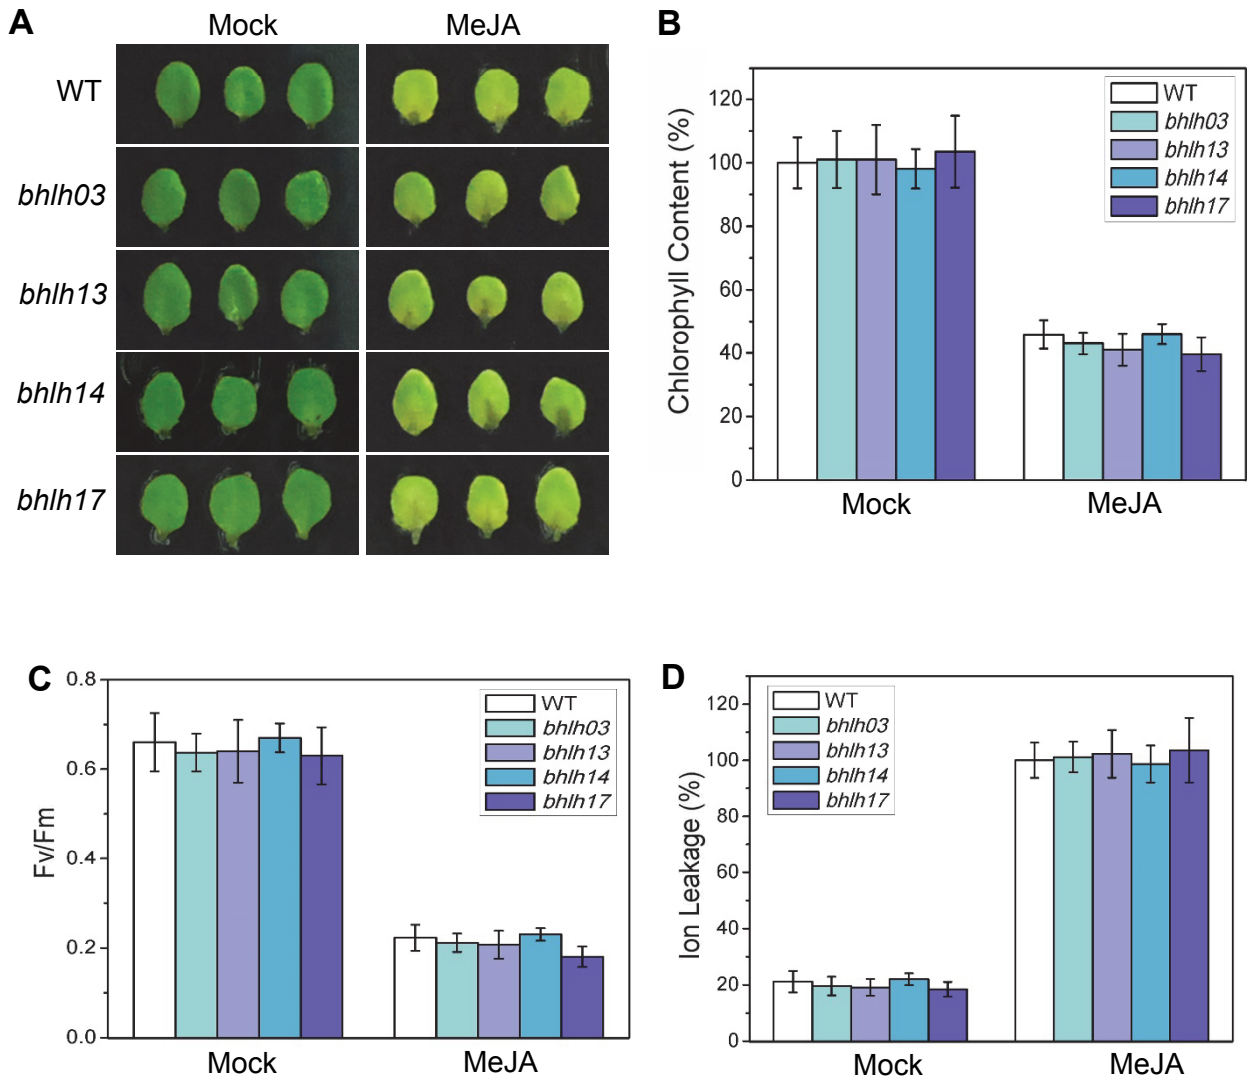

**Supplemental Figure 3. JA-induced leaf senescence is not obviously altered in the *bhlh03*, *bhlh13*, *bhlh14*, and *bhlh17* single mutants.**

(A) The senescence phenotype of the leaves detached from Col-0 and the single mutants *bhlh03*, *bhlh13*, *bhlh14*, *bhlh17*, and treated with mock or 100  $\mu$ M MeJA in the dark for 5 days.

(B-D) Chlorophyll content (B), photochemical efficiency (Fv/Fm) (C) and ion leakage (D) of the detached leaves with the same treatment as shown in (A). The maximum value of the chlorophyll contents in (B) is 2.01 mg/g FW. Data are means ( $\pm$ SD) of three independent biological repeats.

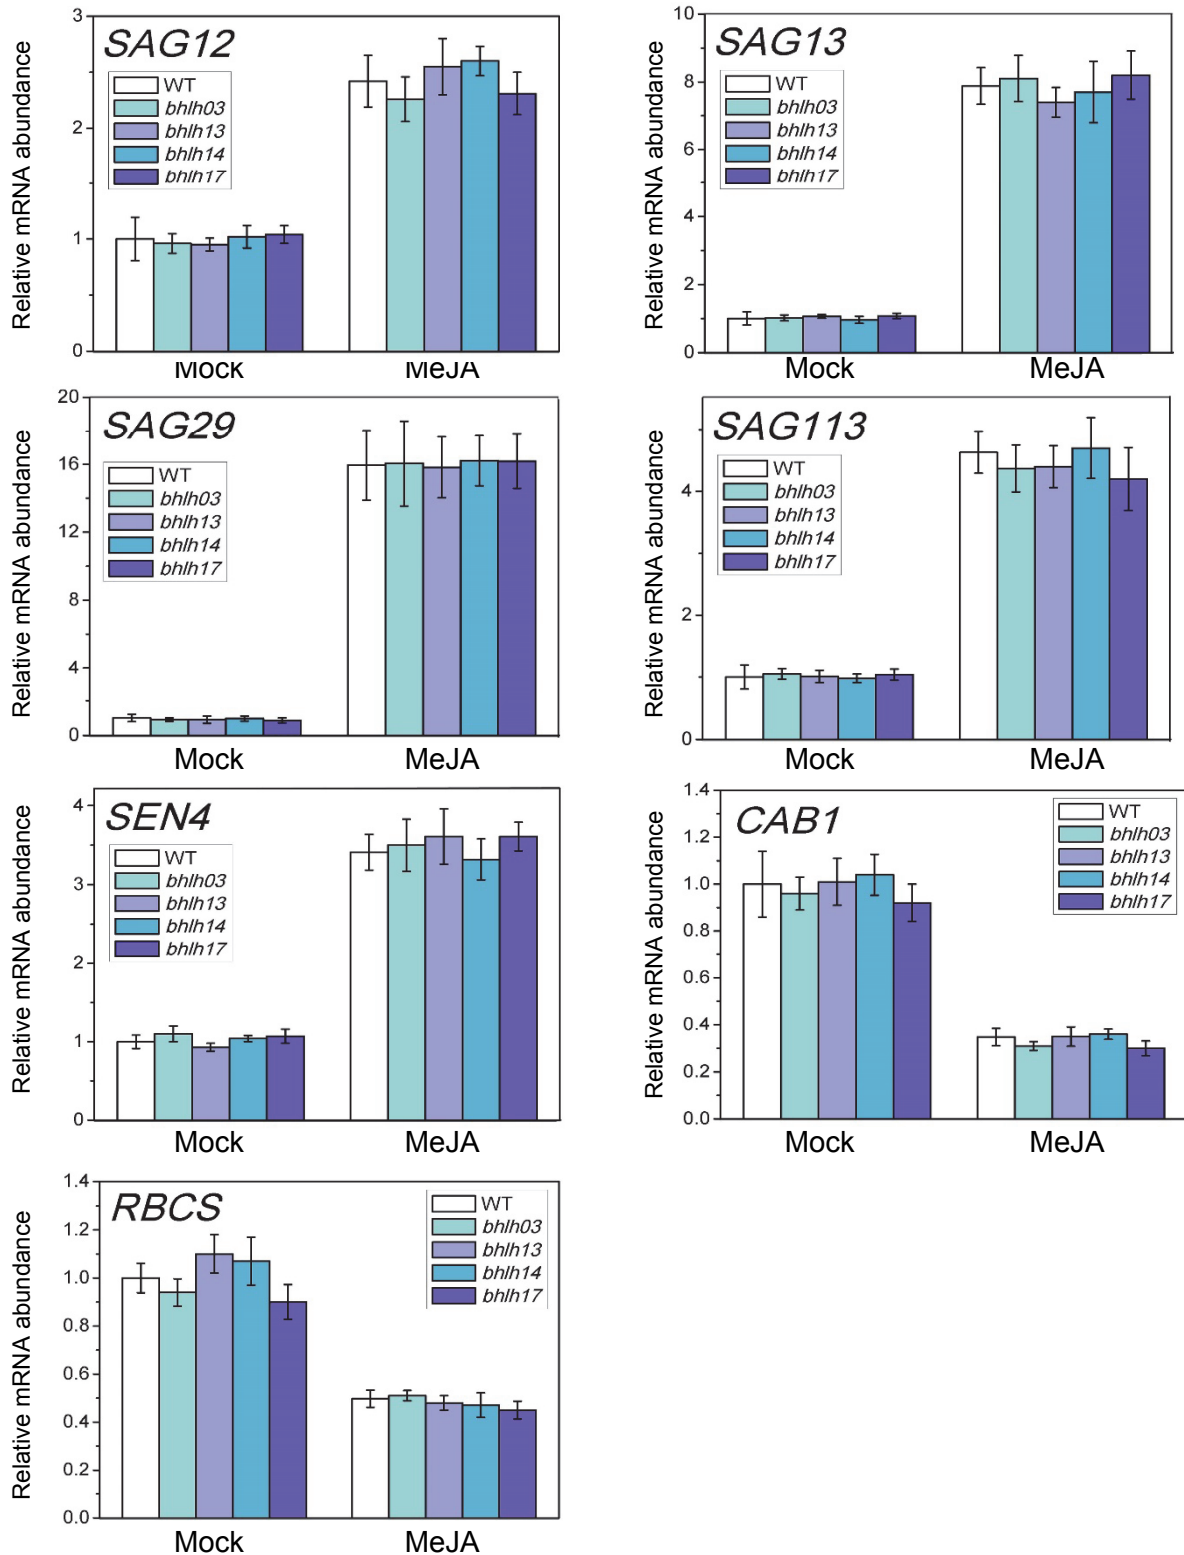

**Supplemental Figure 4. Mutation of single lld bHLHs does not alter the expression of senescence-related genes.**

Quantitative real-time PCR analysis for senescence-associated genes (*SAG12*, *SAG13*, *SAG29*, *SAG113*, *SEN4*) and photosynthetic genes (*CAB1* and *RBCS*) of the detached leaves from three-week-old seedlings of Col-0 and the single mutants *bhlh03*, *bhlh13*, *bhlh14*, *bhlh17* treated without (Mock) or with 100  $\mu$ M MeJA in the dark for 5 days. Y-axis shows the relative mRNA abundance of the detected genes. The mRNA abundance of the detected gene in Mock-treated wild-type with *ACTIN8* as the internal control was set to 1. Data are means ( $\pm$ SD) of three independent biological repeats.

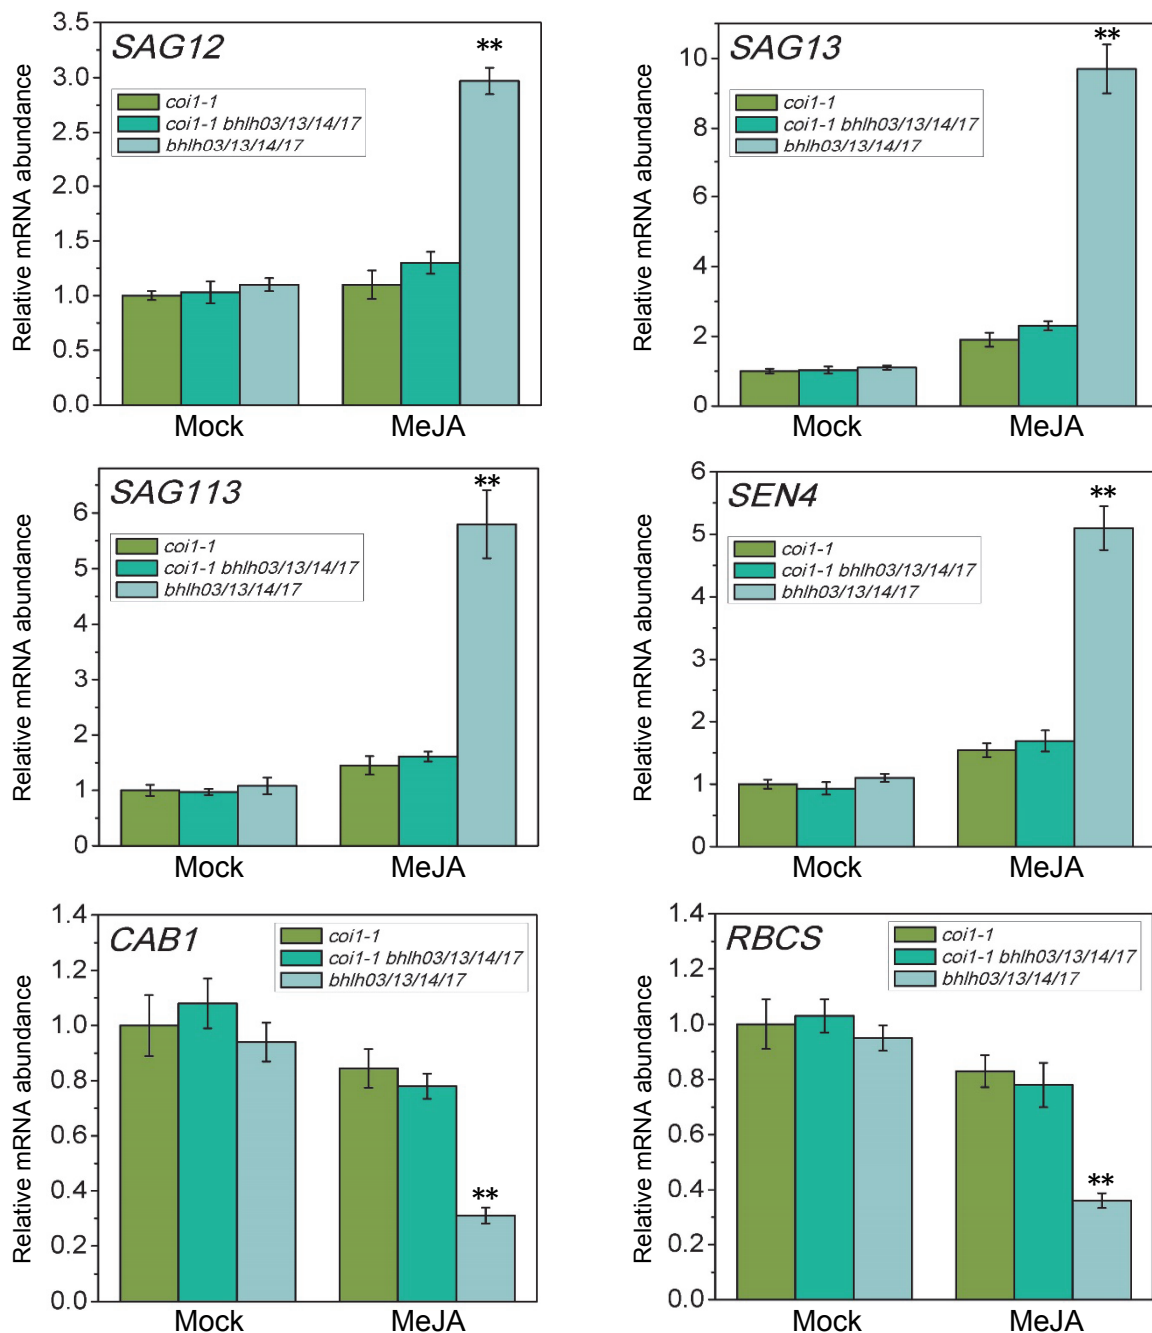

**Supplemental Figure 5. Mutation of the IIIc bHLHs could not recover the expression of Senescence-related Genes in *coi1-1*.**

Quantitative real-time PCR analysis for senescence-associated genes (*SAG12*, *SAG13*, *SAG113*, *SEN4*) and photosynthetic genes (*CAB1* and *RBCS*) of the detached leaves from three-week-old *Arabidopsis coi1-1*, *bhlh03 bhlh13 bhlh14 bhlh17* (*bhlh03/13/14/17*) and *coi1-1 bhlh03 bhlh13 bhlh14 bhlh17* (*coi1-1 bhlh03/13/14/17*) treated without (Mock) or with 100 $\mu$ M MeJA in the dark for 5 days. Y-axis shows the relative mRNA abundance of the detected genes. The mRNA abundance of the detected gene in Mock-treated wild-type with *ACTIN8* as the internal control was set to 1. Data are means ( $\pm$ SD) of three biological repeats. Asterisks represent Student's *t*-test significance compared with *coi1-1* (\*\* P<0.01).

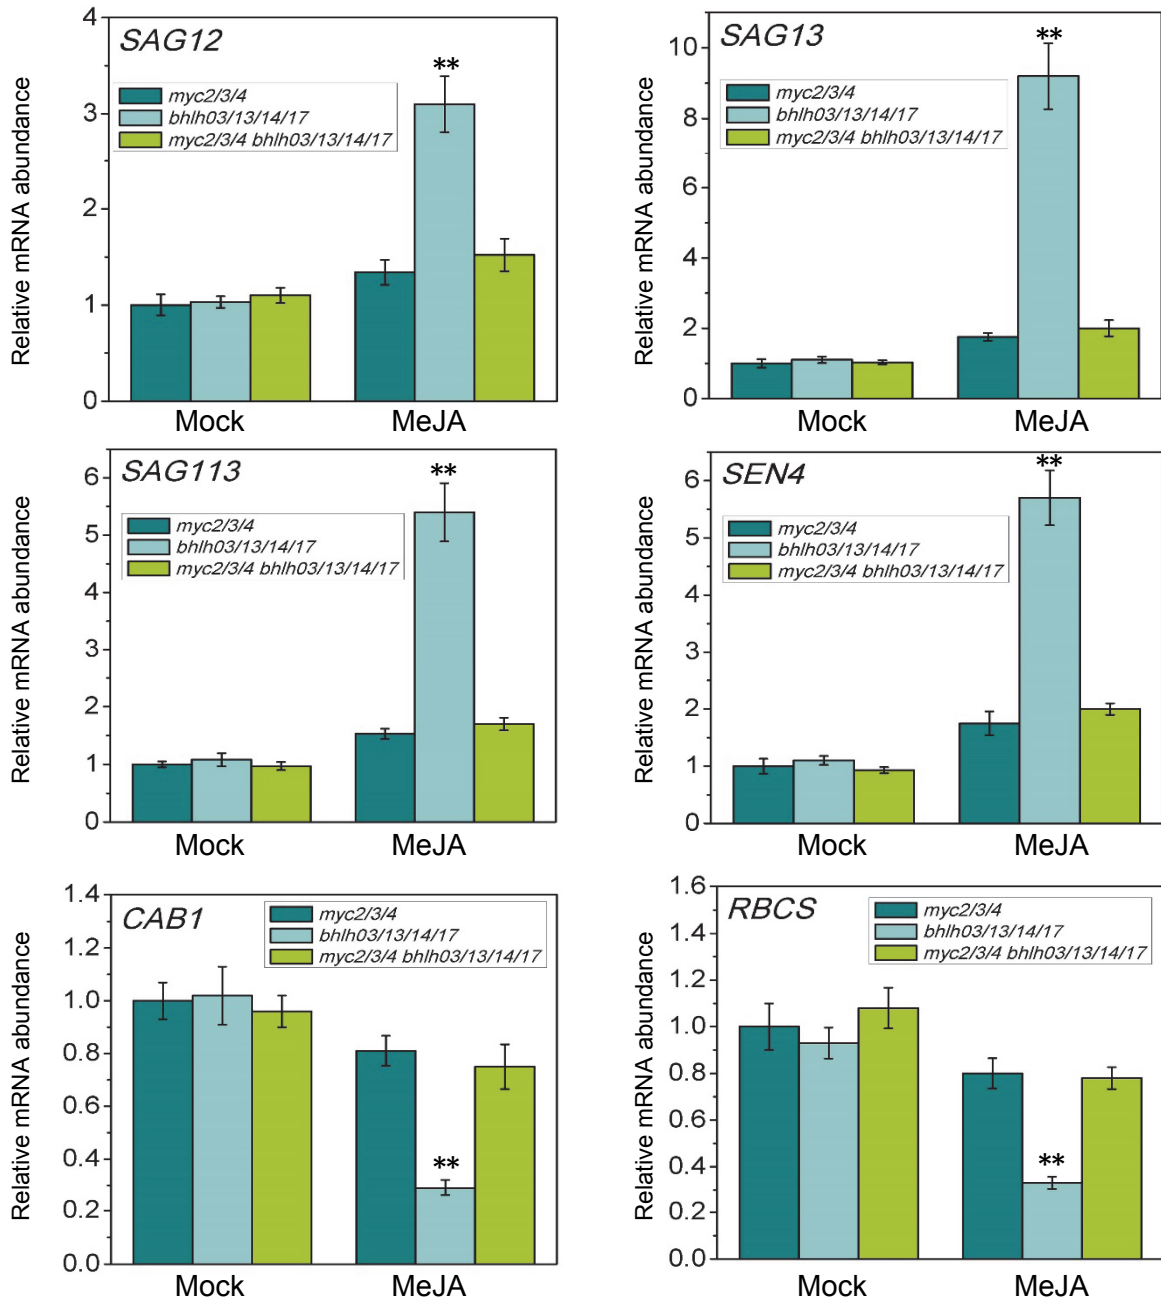

**Supplemental Figure 6. Loss of the lld bHLH factors is unable to accelerate the JA-regulated expression of senescence-related genes in the *myc2*'a *yc3*'a *yc4* triple mutants.**

Quantitative real-time PCR analysis for senescence-associated genes (*SAG12*, *SAG13*, *SAG113*, *SEN4*) and photosynthetic genes (*CAB1* and *RBCS*) of the detached leaves from 3-week old Arabidopsis *myc2 myc3 myc4* (*myc2/3/4*), *bhlh03 bhlh13 bhlh14 bhlh17* (*bhlh03/13/14/17*) and *myc2 myc3 myc4 bhlh03 bhlh13 bhlh14 bhlh17* (*myc2/3/4 bhlh03/13/14/17*) treated without (Mock) or with 100 $\mu$ M MeJA in dark for 5 days. Y-axis means the relative mRNA abundance of the detected genes. The mRNA abundance of the detected gene in Mock-treated wild-type with *ACTIN8* as the internal control was set to 1. Data are means ( $\pm$ SD) of three independent biological repeats. Asterisks represent Student's *t*-test significance compared with *myc2 myc3 myc4* (\*\* P<0.01).

**Supplemental Table 1. Primers Used for Vector Construction.**

|                                                |                   |                                                   |
|------------------------------------------------|-------------------|---------------------------------------------------|
| SAG29pro-pGreenII<br>0800-LUC                  | Forward-KpnI      | cggggtaccatctctgaataatg                           |
| SAG29pro-pGreenII<br>0800-LUC                  | Reverse-Bam<br>HI | cgcggatcctttctatagcaattga                         |
| SAG29pro-pGreenII<br>0800-LUC (G1<br>mutation) | Forward           | gtacaaggaaaaaaaaaaaaaaaaatacctctag<br>acaagagttag |
| SAG29pro-pGreenII<br>0800-LUC (G1<br>mutation) | Reverse           | tttttttttttctctgtacaaaaagaaaacgtaac               |
| SAG29pro-pGreenII<br>0800-LUC (G2<br>mutation) | Forward           | gtttaatctagccatcaaaaaatatttctagctatg<br>ttag      |
| SAG29pro-pGreenII<br>0800-LUC(G2<br>mutation)  | Reverse           | ttttttgatggctagattaaccaacacatttatag               |
| JAZ1-pGreenII 62-SK                            | Forward-SacI      | atcgagctcatgtcgagttctatggaatg                     |
| JAZ1-pGreenII 62-SK                            | Reverse-SalI      | agagtcgactcatatttcagctgctaaac                     |
| JAZ3-pGreenII 62-SK                            | Forward-SacI      | atcGAGCTCatggagagagattttctcg                      |
| JAZ3-pGreenII 62-SK                            | Reverse-SalI      | agaGTCGACcttaggttcagagctgagag                     |
| MYC2- pGreenII<br>62-SK                        | Forward-Sma<br>I  | agacccgggatgactgattaccggctac                      |
| MYC2- pGreenII<br>62-SK                        | Reverse-KpnI      | cggggtacctaaccgattttgaaatc                        |
| bHLH3- pGreenII<br>62-SK                       | Forward-Sma<br>I  | agacccgggatgggtcaaaagtttgggagaatc                 |

|                           |              |                                           |
|---------------------------|--------------|-------------------------------------------|
| bHLH3- pGreenII<br>62-SK  | Reverse-XhoI | ccgctcgagttactgtgatagagaggcaaggag<br>c    |
| bHLH13- pGreenII<br>62-SK | Forward-SmaI | agaccgggatgaatattggtcgcctagtg             |
| bHLH13- pGreenII<br>62-SK | Reverse-Sall | agagtcgacctatctacctgatgatgttc             |
| bHLH17-pGreenII<br>62-SK  | Forward-SmaI | agaccgggatgaatagagtgatttag                |
| bHLH17- pGreenII<br>62-SK | Reverse-Sall | agagtcgacttatataaccagagacctg              |
| MYC3<br>Overexpression    | Forward-Sall | acgcgctgacatgaacggcacaacatcatcaat<br>caac |
| MYC3<br>Overexpression    | Reverse-SpeI | cggactagttcaatagttttctccgactttc           |
| MYC4<br>Overexpression    | Forward-Sall | acgcgctgacatgtctccgacgaatgttcaagtaa<br>cc |
| MYC4<br>Overexpression    | Reverse-SpeI | cggactagttcatggacattctccaactttctc         |
| bHLH03<br>Overexpression  | Forward-XbaI | agctctagaatgggtcaaaagtttgggag             |
| bHLH03<br>Overexpression  | Reverse-SpeI | cggactagttactgtgatagagaggcaag             |
| bHLH13<br>Overexpression  | Forward-Sall | acgcgctgacatgaatattggtcgcctagtgagg        |
| bHLH13<br>Overexpression  | Reverse-SpeI | cggactagttctatctacctgatgatgttcttgac       |
| bHLH14                    | Forward-Sall | acgcgctgacatgtataatctcactttctctcc         |



|                          |              |                                   |
|--------------------------|--------------|-----------------------------------|
| Overexpression           |              |                                   |
| bHLH14<br>Overexpression | Reverse-Spel | cggactagtttataggcttagggttcggacaag |
| bHLH17<br>Overexpression | Forward-Sall | acgcgtcgacatgaatatgagtgattagg     |
| bHLH17<br>Overexpression | Reverse-Spel | cggactagtttatatatacaccagagacctg   |

**Supplemental Table 2. Primers Used for Quantitative Real-time PCR Analysis and ChIP PCR.**

|                        |         |                           |
|------------------------|---------|---------------------------|
| SAG12-Realtime PCR     | Forward | atccaaaagcaacttctattacagg |
| SAG12-Realtime PCR     | Reverse | ccactgccttcatcagtg        |
| SAG13-Realtime PCR     | Forward | aggaaaactcaacatcctcgtc    |
| SAG13-Realtime PCR     | Reverse | gctgactcgagattttagcc      |
| SAG29-Realtime PCR     | Forward | gccaccagggagaaaagg        |
| SAG29-Realtime PCR     | Reverse | ccacgaaatgtgtaccattagaa   |
| SAG113-Realtime<br>PCR | Forward | ccatggctgttcccatgta       |
| SAG113-Realtime<br>PCR | Reverse | aagctacgcgccattgac        |
| SEN4-Realtime PCR      | Forward | aaggtgacaaagagcaacaattc   |
| SEN4-Realtime PCR      | Reverse | ctctctaatgggtgtgtcatcg    |
| CAB1-Realtime PCR      | Forward | gcaaggaaccgtgaactagaa     |
| CAB1-Realtime PCR      | Reverse | tccgaacttgactccgtttc      |
| RBCS-Realtime PCR      | Forward | cgctccttcaacggactta       |
| RBCS-Realtime PCR      | Reverse | agtaatgctgtttagccttgc     |

|                     |              |                             |
|---------------------|--------------|-----------------------------|
| Actin8-Realtime PCR | Forward      | tcagcactttccagcagatg        |
| Actin8-Realtime PCR | Reverse      | ctgtggacaatgcctggac         |
| MYC2-Realtime PCR   | Forward      | tccgagtccggttcattct         |
| MYC2-Realtime PCR   | Reverse      | tctcgggagaaagtgttattgaa     |
| MYC3-Realtime PCR   | Forward      | aggttgggatgtgatgatacg       |
| MYC3-Realtime PCR   | Reverse      | aacctagcaccgggatgat         |
| MYC4-Realtime PCR   | Forward      | aactctttaatctccggtggtg      |
| MYC4-Realtime PCR   | Reverse      | tgtaacttcttcatctccagcttc    |
| bHLH3-Realtime PCR  | Forward      | ggctgcaccgctgagcagttg       |
| bHLH3-Realtime PCR  | Reverse      | gttggcttgcaatagtacattg      |
| bHLH13-Realtime PCR | Forward      | cgagttcaagggttcagag         |
| bHLH13-Realtime PCR | Reverse      | ccactgcatctgcccatt          |
| bHLH14-Realtime PCR | Forward      | cctcttctttgctctcttttacaca   |
| bHLH14-Realtime PCR | Reverse      | aatccggaggagaagaggac        |
| bHLH17-Realtime PCR | Forward      | cagagaaaagaccagtgagcttg     |
| bHLH17-Realtime PCR | Reverse      | gtctcttctcatcaacaacagaaacta |
| SAG29pro-ChIP       | P1 (Forward) | cgctccgtttcgacgcgtggag      |
| SAG29pro-ChIP       | P2 (Reverse) | ccaagtaggaatgaaaccattcac    |
| SAG29pro-ChIP       | P3 (Forward) | gaacggcgtcaattttctgcaaag    |
| SAG29pro-ChIP       | P4 (Reverse) | gggggtgggactggtttcac        |
| ACTIN2pro-ChIP      | Forward      | cgtttcgctttccttagttagct     |

|                |         |                             |
|----------------|---------|-----------------------------|
| ACTIN2pro-ChIP | Reverse | agcgaacggatctagagactcaccttg |
|----------------|---------|-----------------------------|
